# Supplementary material for: Bication lead iodide 2D perovskite component to stabilize inorganic α-CsPbI3 perovskite phase for high-efficiency solar cells
Source: PubMed Central journal article supplement — Sci Adv. 2017 Sep 29;3(9):e1700841. doi: 10.1126/sciadv.1700841 (PMC5621977; doi:10.1126/sciadv.1700841), 2017-09-29
Supplement: 1700841_SM.pdf [file 1700841_SM.pdf]

## Supplementary Materials for

### **Bication lead iodide 2D perovskite component to stabilize inorganic $\alpha$ -CsPbI<sub>3</sub> perovskite phase for high-efficiency solar cells**

Taiyang Zhang, M. Ibrahim Dar, Ge Li, Feng Xu, Nanjie Guo, Michael Grätzel, Yixin Zhao

Published 29 September 2017, *Sci. Adv.* **3**, e1700841 (2017)

DOI: 10.1126/sciadv.1700841

#### **This PDF file includes:**

- fig. S1. Comparative analysis of crystal structures of PbI<sub>2</sub>·xHI and HPbI<sub>3</sub>.
- fig. S2. Morphology of EDAPbI<sub>4</sub> films.
- fig. S3. Schematic structure of (110) layered 2D films.
- fig. S4. The organic compositions of CsPbI<sub>3</sub>·xEDAPbI<sub>4</sub> films.
- fig. S5. Characterization of CsPbI<sub>3</sub> + 0.05PbI<sub>2</sub> with or without EDAl<sub>2</sub>.
- fig. S6. Effect of EDAPbI<sub>4</sub> on the optical properties.
- fig. S7. Effect of EDAPbI<sub>4</sub> on the transient photovoltage behavior.
- fig. S8. Hysteresis behavior of CsPbI<sub>3</sub>·0.025EDAPbI<sub>4</sub>-based device.
- fig. S9. Effect of EDAPbI<sub>4</sub> on the phase stability of CsPbI<sub>3</sub>·xEDAPbI<sub>4</sub> perovskite films.
- fig. S10. Phase stability of CsPbI<sub>3</sub>·0.025EDAPbI<sub>4</sub> perovskite film under room temperature.
- fig. S11. Phase stability of CsPbI<sub>3</sub>·0.025EA<sub>2</sub>PbI<sub>4</sub>-based films.
- fig. S12. Device performance of CsPbI<sub>3</sub>·0.025EA<sub>2</sub>PbI<sub>4</sub>-based solar cell.
- fig. S13. Phase stability of CsPbI<sub>3</sub>·0.025BA<sub>2</sub>PbI<sub>4</sub>-based films.
- fig. S14. Effect of CsPbI<sub>3</sub>·0.025BDAPbI<sub>4</sub> and CsPbI<sub>3</sub>·0.025EDBEPbI<sub>4</sub> 2D perovskite component on the evolution of morphology.
- fig. S15. Phase stability of CsPbI<sub>3</sub>·0.025BDAPbI<sub>4</sub> and CsPbI<sub>3</sub>·0.025EDBEPbI<sub>4</sub> films.

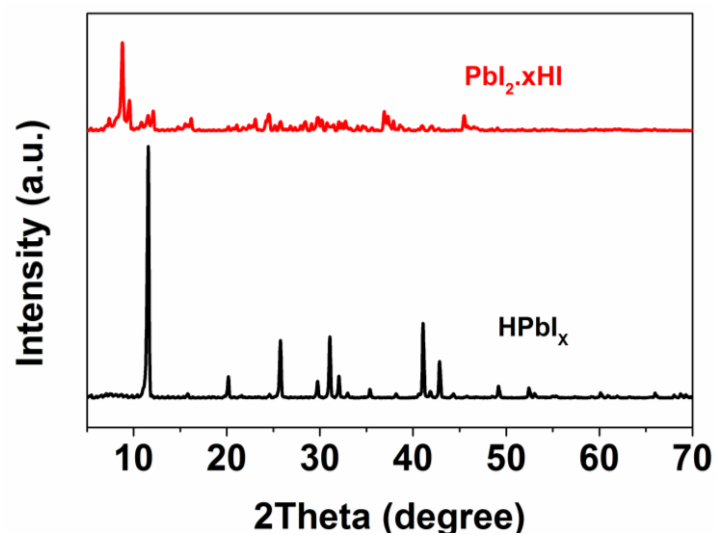

**fig. S1. Comparative analysis of crystal structures of  $\text{PbI}_2 \cdot x\text{HI}$  and  $\text{HPbI}_3$ .** XRD patterns of  $\text{PbI}_2 \cdot x\text{HI}$  and  $\text{HPbI}_3$  powders.

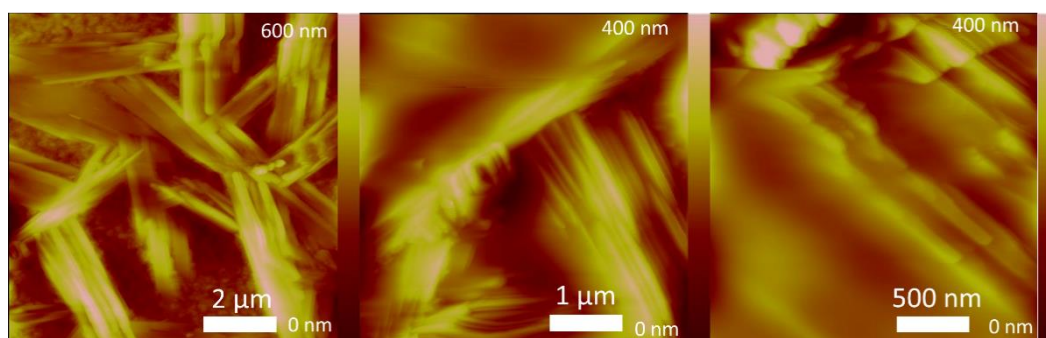

**fig. S2. Morphology of  $\text{EDAPbI}_4$  films.** AFM images of  $\text{EDAPbI}_4$  films.

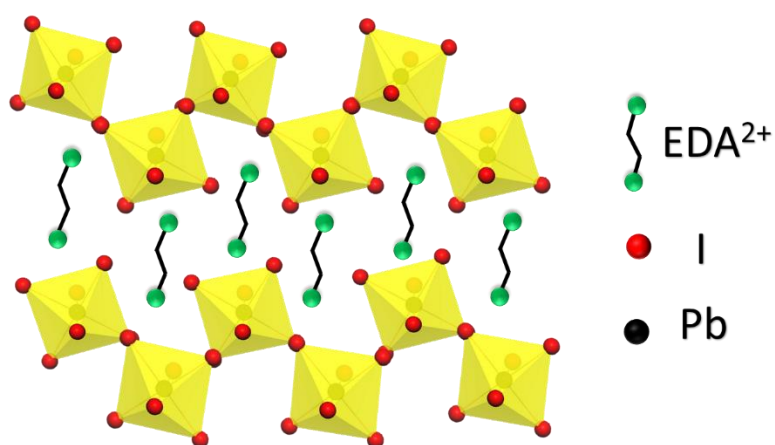

**fig. S3. Schematic structure of (110) layered 2D films.** Schematic structure of  $\text{EDAPbI}_4$ .

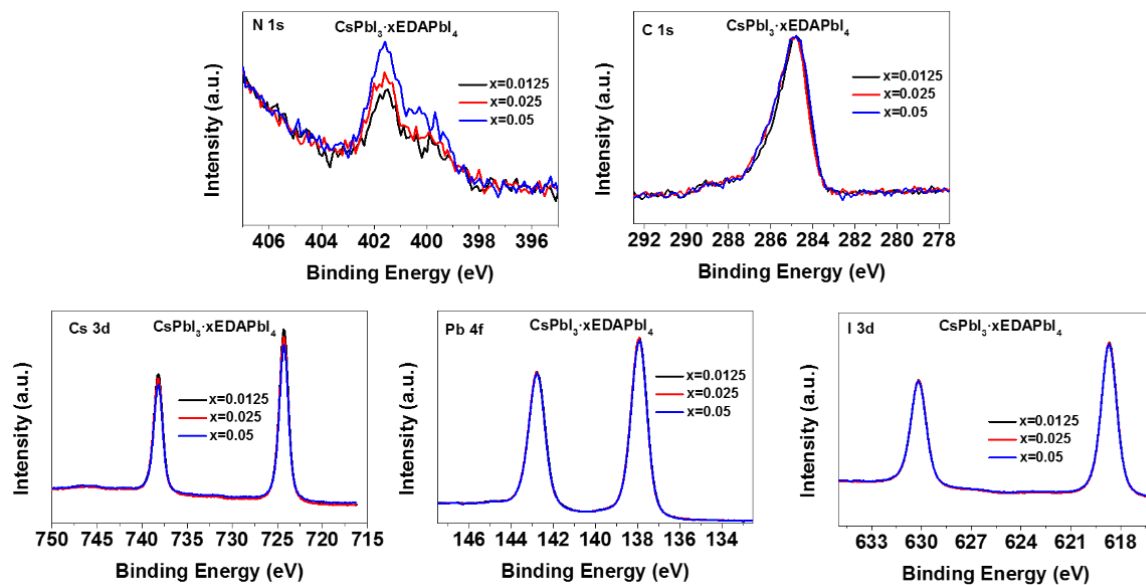

**fig. S4.** The organic compositions of  $\text{CsPbI}_3 \cdot x\text{EDAPbI}_4$  films. XPS analysis of  $\text{CsPbI}_3 \cdot x\text{EDAPbI}_4$  samples ( $x=0 \sim 0.05$ ).

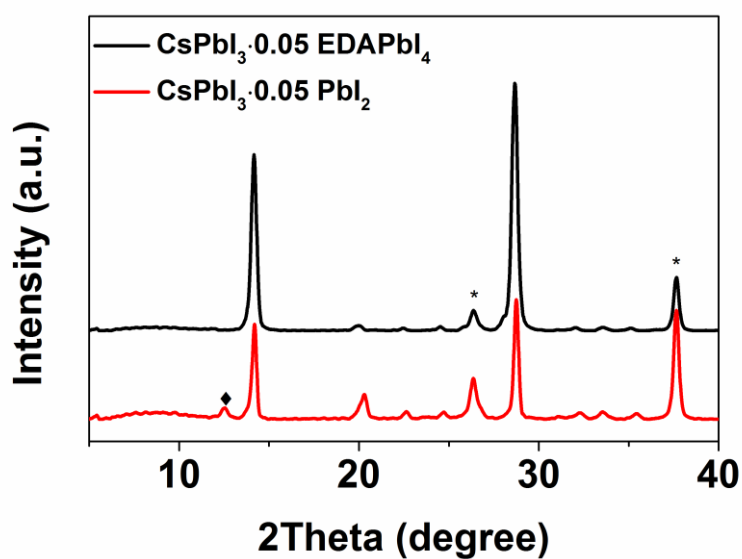

**fig. S5.** Characterization of  $\text{CsPbI}_3 + 0.05\text{PbI}_2$  with or without  $\text{EDAL}_2$ . XRD pattern of  $\text{CsPbI}_3 + 0.05\text{EDAPbI}_4$  and  $\text{CsPbI}_3 + 0.05\text{PbI}_2$  samples. The star is index to FTO pattern, the rectangle is index to  $\text{PbI}_2$  peak.

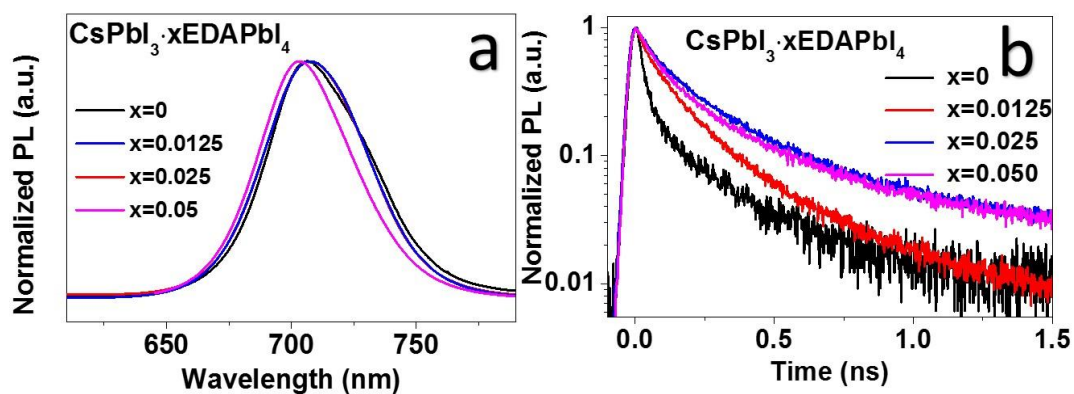

**fig. S6. Effect of EDAPbI<sub>4</sub> on the optical properties.** (a) photoluminescence (b) time-resolved photoluminescence decay curves of CsPbI<sub>3</sub>·xEDAPbI<sub>4</sub> (x=0-0.05) perovskites.

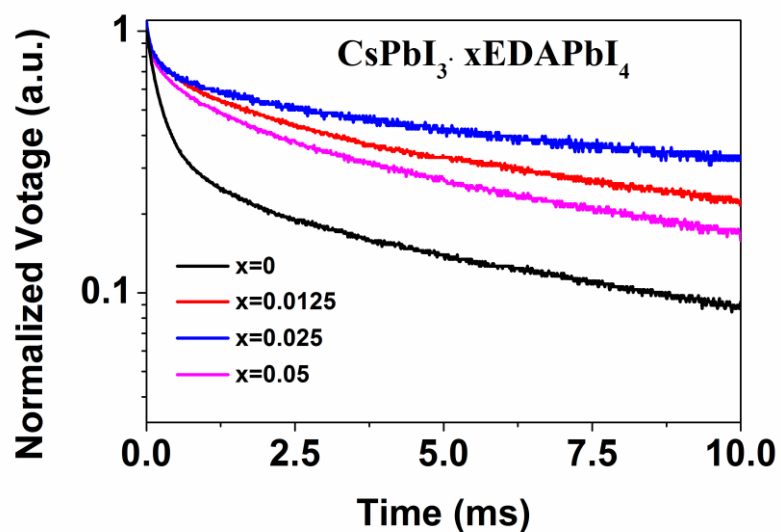

**fig. S7. Effect of EDAPbI<sub>4</sub> on the transient photovoltage behavior.** Transient photovoltage decay curves of perovskite solar cells based on CsPbI<sub>3</sub>·xEDAPbI<sub>4</sub> samples (x: 0–0.05).

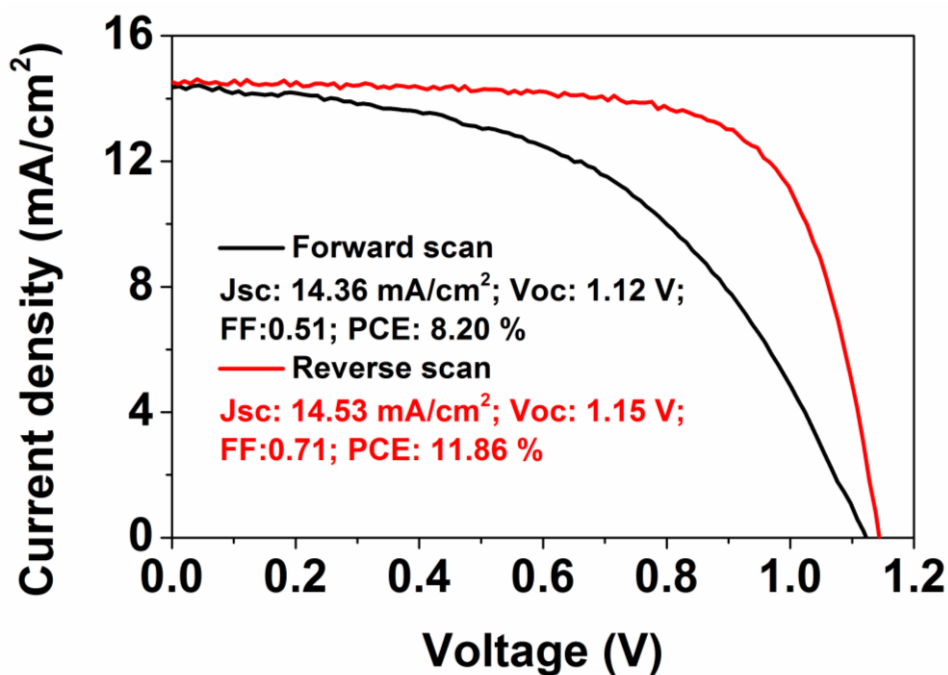

fig. S8. Hysteresis behavior of  $\text{CsPbI}_3 \cdot 0.025\text{EDAPbI}_4$ -based device. A typical forward and reverse scan J-V curve of the perovskite solar cells based on  $\text{CsPbI}_3 \cdot 0.025\text{EDAPbI}_4$  samples.

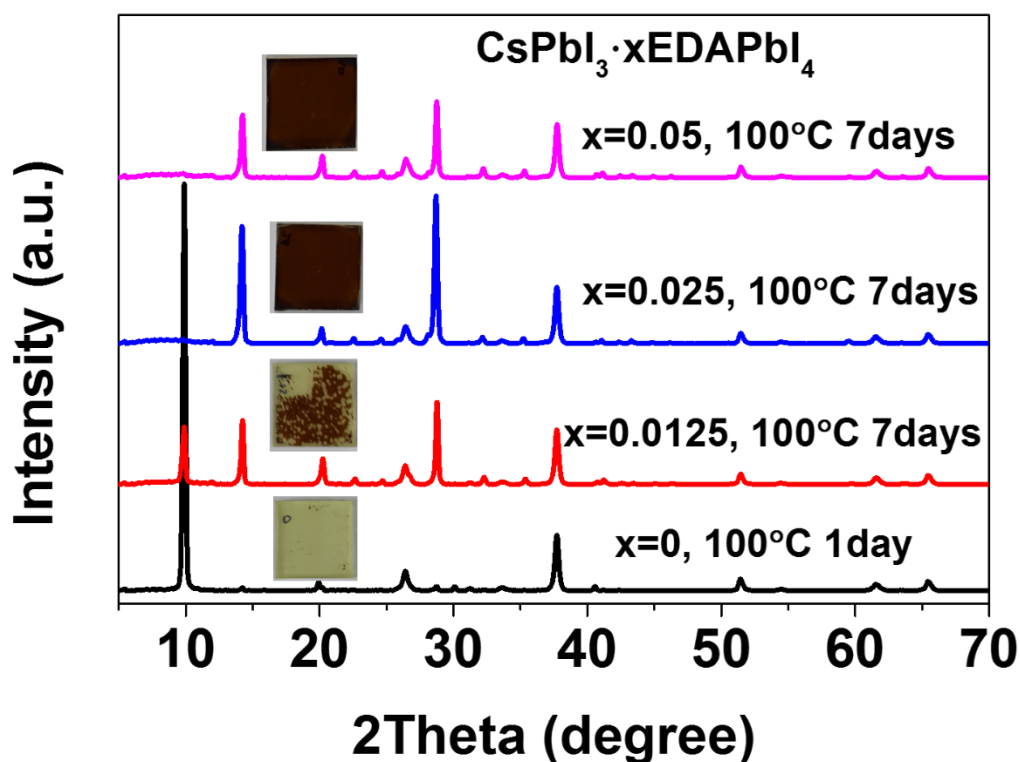

fig. S9. Effect of  $\text{EDAPbI}_4$  on the phase stability of  $\text{CsPbI}_3 \cdot x\text{EDAPbI}_4$  perovskite films. XRD patterns of  $\text{CsPbI}_3 \cdot x\text{EDAPbI}_4$  film heated at 100 °C for 7days (1 day for  $x=0$  samples).

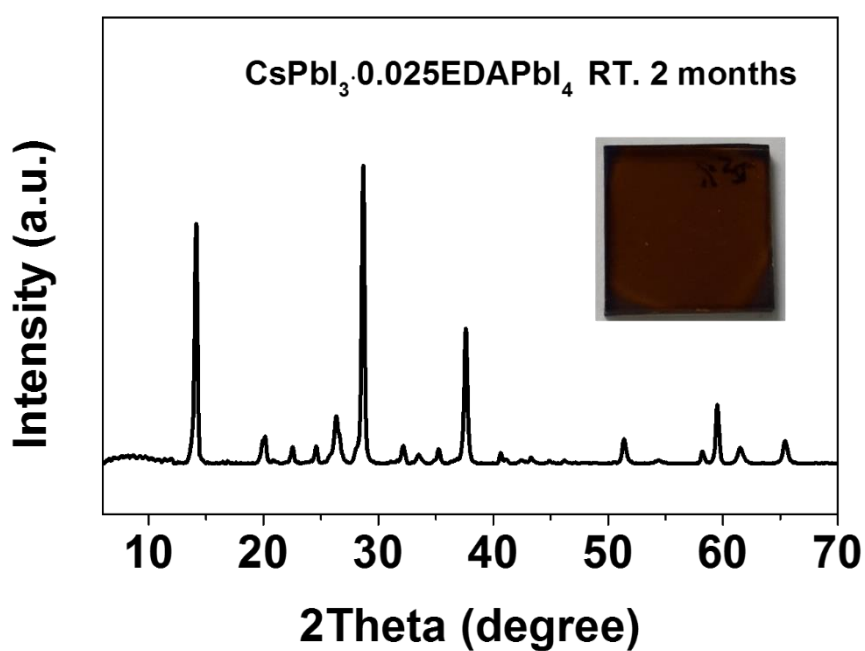

**fig. S10. Phase stability of CsPbI<sub>3</sub>·0.025EDAPbI<sub>4</sub> perovskite film under room temperature.** XRD patterns of CsPbI<sub>3</sub>·0.025EDAPbI<sub>4</sub> film after aged at room temperature in a drybox for two months.

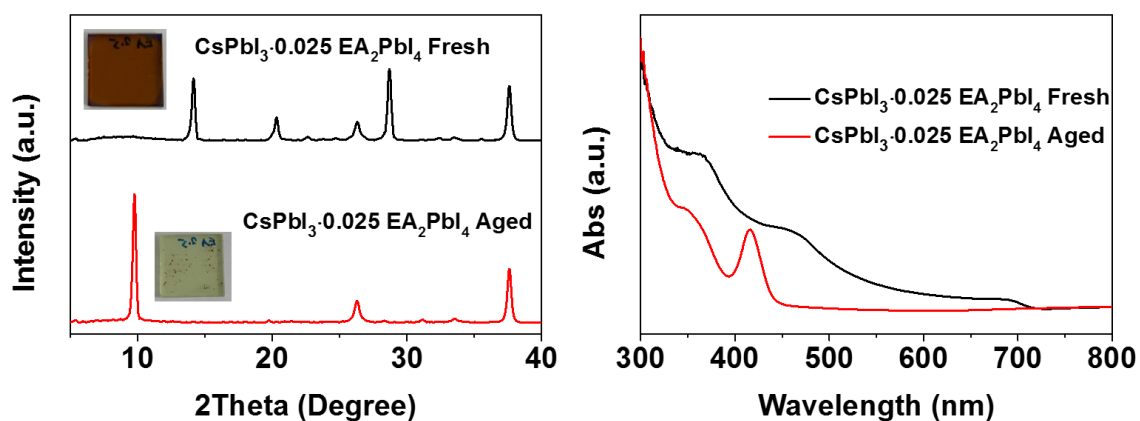

**fig. S11. Phase stability of CsPbI<sub>3</sub>·0.025EA<sub>2</sub>PbI<sub>4</sub>-based films.** XRD pattern and UV-vis spectra of CsPbI<sub>3</sub>·0.05EA<sub>2</sub>PbI<sub>4</sub> films freshly prepared and aged for 1 day at room temperature.

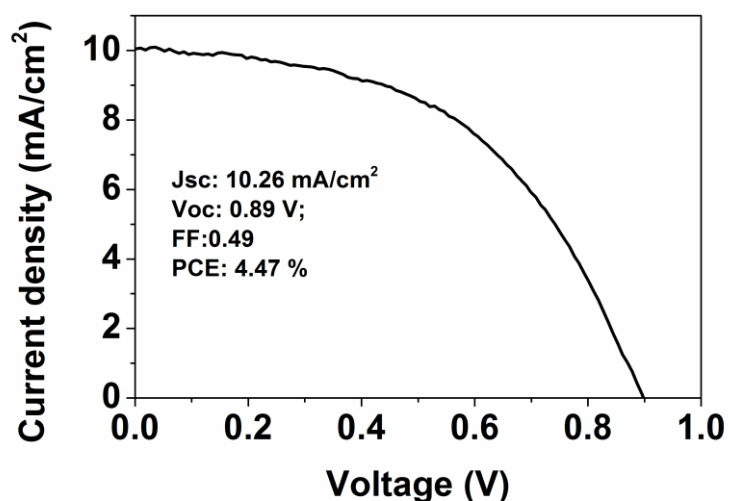

**fig. S12. Device performance of CsPbI<sub>3</sub>·0.025EA<sub>2</sub>PbI<sub>4</sub>-based solar cell.** Champion J-V curves of CsPbI<sub>3</sub>·0.025EA<sub>2</sub>PbI<sub>4</sub> perovskite based solar cells.

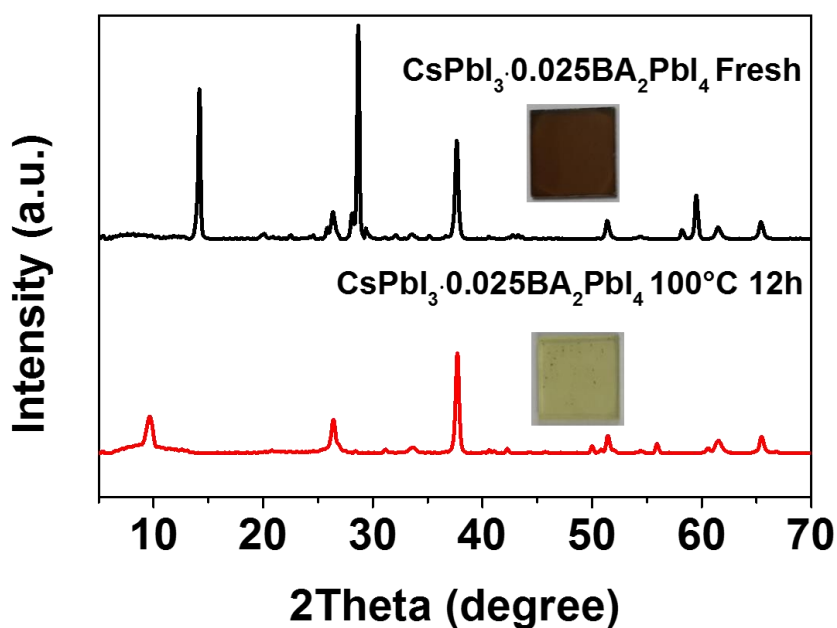

**fig. S13. Phase stability of CsPbI<sub>3</sub>·0.025BA<sub>2</sub>PbI<sub>4</sub>-based films.** XRD patterns of CsPbI<sub>3</sub>·0.025BA<sub>2</sub>PbI<sub>4</sub> films freshly prepared and aged for 12 hrs at 100°C.

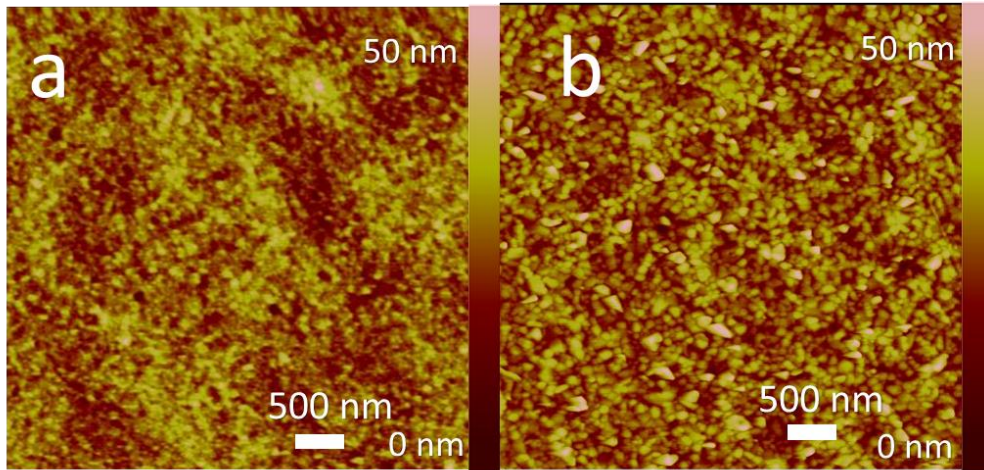

**fig. S14. Effect of CsPbI<sub>3</sub>·0.025BDAPbI<sub>4</sub> and CsPbI<sub>3</sub>·0.025EDBEPbI<sub>4</sub> 2D perovskite component on the evolution of morphology. AFM images of CsPbI<sub>3</sub>·0.025BDAPbI<sub>4</sub> (a) and CsPbI<sub>3</sub>·0.025EDBEPbI<sub>4</sub> (b).**

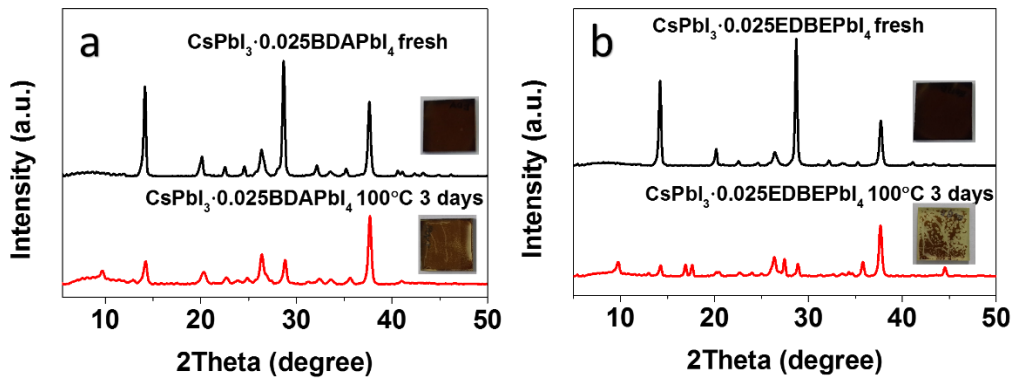

**fig. S15. Phase stability of CsPbI<sub>3</sub>·0.025BDAPbI<sub>4</sub> and CsPbI<sub>3</sub>·0.025EDBEPbI<sub>4</sub> films. XRD patterns of CsPbI<sub>3</sub>·0.025BDAPbI<sub>4</sub> (a) and CsPbI<sub>3</sub>·0.025EDBEPbI<sub>4</sub> (b) films freshly prepared and aged for 3 days at 100°C.**
